# Supplementary material for: Rapid Changes in Transcription Profiles of the Plasmodium yoelii yir Multigene Family in Clonal Populations: Lack of Epigenetic Memory?
Source: PLoS One. 2009 Jan 28;4(1):e4285. doi: 10.1371/journal.pone.0004285 (PMC2628738; doi:10.1371/journal.pone.0004285)
Supplement: Table S1 — Microarray data for 226 yir genes, colour coded according to transcription level. a) Transcribed genes All yir genes showing positive gene expression values above the 90th percentile cut off, with corresponding data values for each sample, are listed. Data points for genes with low (90th–94th percentile; medium (95th–97th percentile) and high (>98th percentile) transcription levels are colour coded as indicated. b) High and Medium transcription in all clones All yir genes exhibiting high/medium gene expression in all clones are listed, with colour coding as indicated (0.08 MB XLS) [file pone.0004285.s001.xls]

## Sheet: Transcribed genes
Microarray data for 226 yir genes, colour coded according to transcription level
(Genes in bold marked * are shown in sheet b)
	Transcription level			low (90th-94th percentile)
				medium (95th-97th percentile)
				high (>98th percentile)
			<0	Below threshold
	Starter Sz	Starter R/Tz	Clone 1 Sz	Clone 1 R/Tz	Clone 2 Sz	Clone 2 R/Tz	Clone 3 Sz	Clone 3 R/Tz	Clone 4 Sz	Clone 4 R/Tz	Clone 5 Sz	Clone 5 R/Tz	Clone 6 Sz
PY00050	<0	<0	<0	<0	0.054418	<0	<0	<0	<0	0.00672626	<0	<0	<0
PY00085	0.0555193	0.0266561	<0	<0	<0	<0	<0	0.0432963	<0	<0	<0	<0	<0
PY00098	<0	<0	<0	<0	<0	0.0458259	<0	<0	<0	<0	<0	<0	<0
PY00171	< 0	< 0	0.295618	<0	<0	<0	0.356658	<0	0.0893788	<0	<0	<0	<0
PY00175	< 0	< 0	<0	<0	<0	<0	<0	<0	<0	<0	<0	0.0395754	<0
PY00177	0.00821438	< 0	<0	<0	<0	<0	0.0281642	<0	0.0182662	<0	0.0156671	0.0243658	<0
PY00236	< 0	< 0	<0	<0	0.00572441	<0	0.00414254	<0	<0	<0	0.0962668	0.000513104	0.00546685
PY00279	< 0	< 0	<0	0.00757575	<0	<0	<0	0.0176099	<0	0.0138523	<0	0.0208678	<0
PY00297	< 0	< 0	0.0458136	<0	<0	<0	<0	0.0521361	<0	0.0355094	<0	<0	<0
PY00300	< 0	< 0	<0	<0	<0	<0	<0	<0	0.0256029	<0	0.0200942	0.00596956	<0
PY00303	< 0	0.0933924	0.0434104	0.00195462	<0	0.00104674	<0	<0	0.025219	0.00050048	<0	0.0311861	<0
PY00305	< 0	< 0	<0	0.019079	<0	0.0452076	<0	<0	<0	<0	<0	<0	<0
PY00395	0.0186275	< 0	0.0138797	0.00637956	<0	0.00458104	0.0591541	<0	0.0779942	<0	<0	<0	<0
PY00482	0.0251354	0.021185	0.0375884	<0	<0	0.0177226	0.00872764	<0	0.0352585	<0	0.0383316	0.0412121	0.0779203
PY00485	< 0	< 0	<0	<0	<0	<0	<0	<0	<0	<0	<0	<0	9.06818e-05
PY00580	0.012201	< 0	<0	<0	0.0366559	<0	0.0125089	<0	0.0182501	<0	<0	<0	<0
PY00748	0.0306678	0.0793754	0.0797717	<0	0.073713	0.0748026	0.235252	0.453562	0.0989721	0.104051	0.0642582	<0	0.00331006
PY00754	< 0	< 0	<0	<0	<0	<0	0.0177224	<0	<0	<0	0.0279464	<0	<0
PY00815	< 0	< 0	<0	<0	0.0198321	<0	<0	<0	<0	<0	<0	<0	<0
PY00823	0.0411485	< 0	<0	<0	<0	<0	<0	0.0102911	<0	0.0368102	<0	<0	<0
PY00843	< 0	< 0	<0	<0	<0	<0	<0	0.0871504	<0	<0	<0	<0	0.0163829
PY00924	0.109352	< 0	0.0546707	<0	<0	<0	0.0710103	<0	<0	<0	0.0967694	0.00114277	0.027132
PY01079	0.214019	0.0849405	0.0158368	0.171783	0.0362228	0.195764	0.159398	<0	<0	0.00849997	<0	0.0666772	0.0646792
PY01080	< 0	< 0	<0	0.0435283	<0	<0	<0	<0	<0	<0	<0	<0	<0
PY01110	0.0753482	0.0523923	0.125707	0.0915819	0.0895911	0.0672188	0.144513	0.104131	0.0350983	0.0472732	0.0944959	0.120804	0.102252	*
PY01304	< 0	< 0	<0	<0	<0	<0	<0	<0	<0	<0	0.0833684	<0	<0
PY01318	< 0	< 0	<0	<0	<0	0.00470948	<0	<0	<0	<0	<0	<0	<0
PY01331	< 0	< 0	<0	<0	<0	<0	0.000795274	<0	<0	<0	<0	<0	<0
PY01394	0.15139	< 0	0.0288472	<0	0.106425	0.130383	0.185851	0.111181	<0	<0	<0	0.00862084	0.0803404
PY01466	< 0	0.00449207	0.0858421	0.00426566	<0	0.0279603	<0	<0	<0	<0	<0	0.0300424	0.0326333
PY01541	0.0139658	0.00449207	0.0596782	0.000820358	<0	0.129255	<0	<0	<0	<0	<0	0.0300424	0.000792688
PY01578	< 0	< 0	<0	<0	<0	<0	<0	<0	<0	<0	<0	<0	0.0496015
PY01597	< 0	< 0	<0	<0	<0	<0	<0	<0	9.86592e-05	0.0489265	<0	0.0180338	<0
PY01773	< 0	< 0	<0	<0	<0	<0	<0	<0	0.0235101	<0	<0	<0	<0
PY01774	< 0	< 0	<0	<0	<0	<0	<0	<0	0.0936629	<0	<0	<0	<0
PY01810	< 0	< 0	<0	<0	<0	<0	<0	<0	<0	<0	<0	<0	0.136185
PY01837	< 0	< 0	<0	0.000351152	<0	<0	<0	<0	<0	<0	<0	<0	<0
PY01842	< 0	< 0	<0	<0	<0	<0	<0	<0	<0	0.0373244	<0	<0	<0
PY01865	0.00491615	< 0	0.00379774	0.0129651	0.0327385	<0	<0	<0	<0	<0	0.0181075	<0	<0
PY01963	0.0744506	< 0	0.00566471	<0	<0	<0	<0	<0	<0	<0	0.0908401	<0	<0
PY01966	0.251233	0.106974	0.0925372	0.124666	0.201652	0.107972	0.0891364	0.00166548	0.0665535	0.105941	0.290925	0.321755	0.108846	*
PY01967	< 0	0.130538	<0	<0	<0	<0	0.181583	<0	<0	<0	0.108651	<0	<0
PY02038	< 0	< 0	<0	0.0849414	<0	<0	<0	<0	<0	<0	<0	<0	<0
PY02114	< 0	0.363503	0.210368	<0	<0	0.754484	0.424842	0.14626	0.0822379	1.23997	0.322895	0.908148	0.359804	*
PY02131	< 0	< 0	<0	<0	<0	<0	<0	<0	<0	<0	<0	0.0322086	<0
PY02137	< 0	0.0151873	<0	<0	<0	<0	<0	<0	<0	0.0150416	<0	<0	0.0411807
PY02312	0.0309186	0.0557124	0.0218412	0.0177732	0.0825096	<0	0.00917943	0.0011741	0.039319	0.0163259	<0	0.0469953	0.0106532
PY02354	< 0	< 0	<0	<0	0.0549661	0.0127583	<0	<0	<0	<0	<0	<0	<0
PY02357	0.00364472	< 0	<0	<0	<0	<0	<0	<0	<0	<0	0.0102944	<0	<0
PY02362	0.0569829	0.0273729	0.0155442	0.0443465	0.0920896	0.0228001	0.00440253	0.00651277	0.039095	0.0193335	0.0122557	<0	0.0236735
PY02364	< 0	0.0726222	<0	<0	0.124473	<0	<0	<0	<0	<0	<0	<0	<0
PY02369	0.0139658	0.00449207	<0	0.000820358	<0	<0	<0	<0	0.0240888	<0	<0	<0	0.0538241
PY02449	< 0	< 0	<0	<0	<0	<0	<0	0.0053369	<0	<0	<0	<0	<0
PY02450	< 0	0.047449	<0	<0	<0	<0	<0	<0	<0	<0	<0	<0	<0
PY02517	< 0	< 0	<0	0.00759098	<0	<0	<0	<0	<0	<0	<0	<0	<0
PY02523	< 0	< 0	<0	<0	<0	<0	<0	<0	0.117018	<0	<0	<0	<0
PY02544	< 0	0.0612815	0.0362548	<0	<0	<0	<0	0.00767757	<0	0.035118	0.00144348	<0	<0
PY02671	< 0	< 0	<0	<0	<0	<0	<0	0.0920313	<0	<0	<0	<0	<0
PY02687	0.180241	0.15745	0.0172447	0.0349788	0.0951299	<0	<0	<0	0.3389	0.103975	0.059963	0.105798	0.0343926
PY02689	< 0	< 0	<0	<0	<0	<0	<0	<0	<0	<0	<0	0.0455703	<0
PY02702	< 0	0.0117307	<0	<0	<0	<0	0.0121473	<0	<0	<0	<0	<0	<0
PY02735	< 0	< 0	<0	<0	<0	<0	<0	<0	<0	<0	0.191996	<0	<0
PY02760	< 0	< 0	<0	<0	<0	<0	0.00543659	<0	<0	0.0795096	<0	<0	<0
PY02782	< 0	< 0	<0	0.00653781	0.0330134	<0	<0	<0	<0	<0	<0	<0	<0
PY02825	< 0	< 0	<0	0.221595	<0	<0	<0	<0	<0	<0	<0	<0	<0
PY02828	< 0	< 0	<0	<0	<0	0.0561292	<0	<0	<0	<0	<0	<0	<0
PY02928	0.0893419	0.0386505	0.0390468	0.0349788	0.0637969	0.0411237	0.0317164	0.0152649	<0	0.0464031	0.0249517	0.0379468	0.015604
PY02970	< 0	< 0	<0	<0	<0	0.121062	<0	<0	<0	<0	<0	0.00936305	<0
PY02972	0.135992	0.0700628	0.233306	0.183989	0.197792	0.01501	0.142471	0.0787594	0.100335	0.0642414	0.135793	0.245071	0.122997	*
PY02976	< 0	< 0	<0	<0	<0	<0	0.00165679	<0	<0	<0	<0	<0	<0
PY02997	0.00283209	< 0	<0	0.0533216	<0	<0	<0	0.0222221	0.0129551	<0	<0	<0	<0
PY03029	< 0	0.015253	<0	<0	<0	<0	<0	<0	<0	<0	<0	<0	<0
PY03178	0.0814483	0.0345036	0.0569798	0.0683028	0.0663121	0.0719766	0.0650404	0.0485889	0.088126	0.0668555	0.0606717	0.120022	0.0682752	*
PY03193	< 0	< 0	<0	<0	<0	<0	0.00945505	<0	<0	<0	<0	<0	<0
PY03196	< 0	< 0	<0	<0	0.0239579	<0	0.00193341	<0	<0	<0	<0	<0	<0
PY03331	0.00987408	0.000400382	0.000796636	<0	<0	0.0378752	<0	0.0377775	0.0279564	<0	<0	<0	<0
PY03334	< 0	< 0	<0	<0	0.013581	<0	<0	<0	<0	<0	<0	<0	0.0665425
PY03358	< 0	< 0	<0	<0	<0	<0	<0	<0	<0	<0	0.00429564	<0	<0
PY03362	< 0	< 0	<0	0.00754012	<0	<0	<0	<0	<0	<0	<0	<0	<0
PY03398	< 0	< 0	<0	<0	<0	<0	<0	0.0277308	<0	0.0947967	<0	<0	<0
PY03415	< 0	< 0	<0	0.0433063	<0	<0	<0	<0	<0	<0	<0	<0	<0
PY03540	< 0	< 0	0.00423991	<0	<0	<0	<0	<0	<0	<0	<0	<0	<0
PY03580	< 0	< 0	<0	<0	<0	<0	<0	<0	<0	0.0167233	<0	<0	<0
PY03595	< 0	< 0	<0	<0	<0	<0	<0	<0	<0	<0	0.00125583	0.0156927	<0
PY03597	0.0352129	< 0	0.00783233	<0	<0	0.00286326	<0	<0	0.0270328	<0	0.113707	0.0329864	0.0037367
PY03642	< 0	0.00924395	0.0212005	<0	<0	<0	<0	<0	<0	<0	<0	<0	<0
PY03695	0.0866752	0.00449207	0.00488832	<0	<0	0.000656673	<0	<0	0.0240888	<0	0.000343185	<0	0.000792688
PY03699	< 0	0.0281462	0.010661	0.0357958	0.0757902	<0	0.0265217	<0	0.0421182	0.0733996	0.0645346	0.077529	0.134239
PY03729	0.0124517	0.00382307	<0	<0	0.0370738	0.021626	0.00352812	0.0847331	<0	0.0232361	<0	0.011104	0.120516
PY03731	< 0	0.0635383	<0	<0	0.0296384	0.033945	<0	<0	0.00452475	<0	<0	<0	<0
PY03742	0.00088877	< 0	0.0122003	<0	<0	<0	<0	<0	<0	0.00695795	<0	<0	<0
PY03747	< 0	< 0	<0	<0	<0	<0	<0	0.00371283	<0	<0	<0	<0	<0
PY03784	< 0	< 0	0.19119	<0	0.0139476	<0	<0	<0	<0	<0	<0	<0	<0
PY03825	< 0	< 0	<0	<0	<0	0.0517103	<0	<0	<0	<0	<0	<0	<0
PY03837	< 0	< 0	0.0119718	<0	<0	<0	0.0183149	<0	<0	0.0145394	<0	<0	<0
PY03906	< 0	0.0066213	0.00701755	<0	0.0066249	0.00204848	<0	<0	0.026218	0.0474669	<0	<0	0.00292192
PY03983	< 0	0.047613	<0	<0	<0	0.000537028	<0	<0	<0	0.0450537	<0	0.0189059	<0
PY03985	< 0	0.00449207	<0	<0	<0	<0	<0	<0	0.0240888	0.0668555	0.0256439	0.00177299	0.101439
PY03986	0.113945	0.167476	<0	0.178212	0.236576	0.149947	0.0850953	0.267115	0.201481	0.136774	0.204025	0.201715	0.194412	*
PY03998	< 0	< 0	0.0246875	0.0395236	<0	0.143073	0.0300925	0.000973349	<0	0.0274132	0.0580317	0.0232464	0.0206596
PY04006	< 0	< 0	<0	<0	<0	0.331037	0.123392	<0	<0	<0	<0	<0	<0
PY04021	0.136687	0.264472	0.224679	0.197735	0.311135	0.11517	0.221653	0.0640603	0.221917	0.105584	0.288472	0.291554	0.0908413	*
PY04052	0.0294018	0.0521597	0.0646224	0.120463	<0	0.0236825	<0	<0	0.0997075	0.0251554	0.0396797	0.0541782	0.0240846
PY04233	< 0	< 0	<0	<0	0.0506852	<0	<0	<0	<0	<0	<0	<0	<0
PY04266	< 0	< 0	<0	<0	<0	<0	<0	0.01879	<0	<0	0.00595828	<0	<0
PY04310	0.0187628	0.0913337	0.0618655	0.00133724	0.0558068	0.0568964	0.0582569	0.059348	0.0810659	<0	0.046352	0.0870196	0.0577698	*
PY04327	< 0	< 0	0.0461676	<0	<0	0.0166221	<0	<0	<0	<0	<0	<0	<0
PY04423	< 0	< 0	<0	<0	<0	<0	<0	<0	<0	<0	<0	<0	0.00825966
PY04425	< 0	< 0	<0	<0	<0	<0	<0	0.0650989	<0	<0	<0	<0	<0
PY04430	< 0	0.0160953	<0	<0	0.0562156	<0	<0	0.0214945	<0	<0	0.0584419	<0	<0
PY04461	< 0	< 0	<0	<0	<0	<0	<0	<0	<0	0.0445375	<0	<0	<0
PY04478	< 0	< 0	<0	<0	<0	<0	0.0635016	<0	<0	<0	<0	<0	<0
PY04541	< 0	< 0	<0	<0	0.00839619	<0	<0	<0	<0	<0	<0	<0	<0
PY04580	< 0	< 0	<0	<0	<0	<0	<0	<0	<0	0.0546773	<0	<0	<0
PY04782	< 0	< 0	<0	<0	<0	<0	<0	<0	<0	<0	<0	0.0150723	<0
PY04783	0.0698979	< 0	<0	<0	<0	0.0584253	<0	<0	<0	<0	<0	<0	<0
PY04786	< 0	0.132645	0.105467	<0	<0	<0	<0	0.122699	<0	<0	<0	0.00528767	<0
PY04787	0.203569	0.132442	<0	<0	0.0794946	<0	<0	<0	<0	<0	<0	<0	<0
PY04914	< 0	< 0	<0	<0	0.142226	<0	0.0769914	0.075615	<0	<0	0.0325047	<0	<0
PY04923	< 0	< 0	<0	<0	0.0207632	<0	<0	<0	<0	0.0131334	<0	<0	<0
PY04931	0.136085	0.111447	<0	0.000820358	<0	<0	0.125603	<0	0.0294617	<0	0.0703841	<0	0.000792688
PY04964	< 0	0.0367615	<0	<0	<0	<0	<0	<0	<0	<0	<0	<0	<0
PY04988	< 0	< 0	<0	<0	0.00316106	<0	<0	<0	<0	<0	<0	<0	<0
PY04998	< 0	< 0	<0	0.0359312	<0	0.0502433	<0	<0	<0	<0	<0	<0	<0
PY05010	< 0	< 0	<0	<0	0.0594574	<0	<0	<0	<0	<0	<0	<0	<0
PY05021	< 0	< 0	<0	<0	<0	0.122935	0.00593516	<0	<0	<0	<0	<0	<0
PY05067	< 0	< 0	<0	0.0135148	<0	<0	<0	<0	<0	<0	<0	<0	<0
PY05121	< 0	0.0484033	0.178376	<0	<0	0.317851	0.241896	<0	0.159155	0.138957	<0	0.0244179	0.179845
PY05148	< 0	0.0114295	<0	<0	<0	<0	<0	<0	<0	<0	<0	<0	<0
PY05166	< 0	< 0	<0	<0	<0	<0	<0	0.0106029	<0	0.016182	<0	<0	<0
PY05220	< 0	< 0	<0	<0	<0	0.0566575	<0	<0	<0	<0	0.00755691	<0	<0
PY05243	< 0	< 0	<0	<0	<0	<0	0.0378397	<0	<0	<0	<0	<0	<0
PY05318	0.138589	0.0951836	<0	0.131454	0.0895211	0.0906108	0.0914042	0.071798	0.116331	0.0827002	0.0967694	0.0523959	0.0679761	*
PY05362	< 0	< 0	0.0329696	<0	<0	<0	<0	<0	<0	<0	<0	<0	<0
PY05403	< 0	< 0	<0	<0	<0	<0	<0	<0	<0	0.0268894	<0	<0	<0
PY05442	< 0	< 0	<0	<0	<0	<0	<0	<0	0.00745635	<0	<0	<0	<0
PY05507	0.00455256	< 0	<0	0.0103087	0.0562808	<0	<0	0.00132227	0.112242	<0	<0	<0	<0
PY05638	0.0506565	< 0	<0	0.00281618	<0	<0	<0	<0	<0	0.10953	<0	0.665317	0.0513794
PY05673	< 0	< 0	<0	<0	<0	<0	0.00364406	<0	<0	<0	<0	<0	<0
PY05689	< 0	< 0	<0	<0	0.000627219	0.042282	<0	<0	0.0122372	0.0283491	<0	<0	<0
PY05698	< 0	< 0	<0	<0	<0	<0	<0	<0	<0	0.036105	<0	<0	<0
PY05731	< 0	< 0	<0	<0	<0	<0	0.0254963	<0	<0	<0	<0	<0	<0
PY05767	< 0	< 0	<0	0.00376437	<0	<0	0.00405496	<0	<0	<0	0.0985626	<0	0.195938
PY05769	0.176767	< 0	<0	<0	0.0567374	0.423919	0.0152009	0.726058	<0	<0	<0	<0	<0
PY05781	< 0	< 0	<0	<0	<0	<0	<0	<0	<0	<0	0.0122393	<0	<0
PY05808	0.000663533	< 0	<0	<0	<0	<0	<0	<0	<0	<0	<0	<0	<0
PY05816	< 0	< 0	<0	<0	<0	<0	0.0284585	<0	<0	<0	<0	<0	<0
PY05826	< 0	0.0210157	<0	0.0125396	<0	<0	<0	0.0087879	<0	<0	<0	<0	<0
PY05830	< 0	< 0	<0	<0	<0	<0	<0	<0	<0	<0	0.0486467	<0	<0
PY05894	0.195083	0.431776	0.248675	0.427501	0.0644802	0.0120509	0.324114	0.224893	0.165916	0.0360341	1.11579	0.655613	0.302853	*
PY05901	< 0	< 0	<0	0.09305	<0	0.020995	0.0544513	<0	<0	<0	0.00564082	<0	<0
PY06089	0.0622111	0.0260903	0.0157296	<0	0.0999543	0.0435839	0.0191562	0.00270471	0.0456871	0.0167807	0.0109731	0.0516407	<0
PY06126	0.0477444	< 0	0.0124363	0.105406	<0	0.00746719	0.0051059	<0	0.00138896	0.00692092	0.00493614	0.0375904	0.00489532
PY06132	< 0	< 0	<0	<0	<0	0.0123193	<0	<0	<0	<0	<0	<0	0.00431754
PY06172	< 0	< 0	<0	<0	<0	<0	<0	<0	<0	<0	<0	<0	0.0411807
PY06215	< 0	< 0	<0	<0	<0	<0	<0	<0	<0	<0	<0	<0	0.00512983
PY06324	< 0	0.0450714	<0	0.0241774	<0	<0	<0	<0	<0	<0	<0	<0	<0
PY06326	< 0	< 0	<0	<0	<0	<0	<0	0.0214945	<0	<0	<0	<0	<0
PY06337	< 0	< 0	<0	<0	<0	<0	<0	0.0272111	<0	<0	<0	<0	<0
PY06339	< 0	< 0	<0	0.262977	<0	<0	0.0438628	<0	0.0356634	<0	<0	<0	<0
PY06340	< 0	< 0	<0	<0	<0	<0	<0	<0	<0	<0	<0	0.000513104	<0
PY06352	< 0	< 0	<0	<0	<0	<0	<0	<0	<0	0.0323463	<0	<0	<0
PY06400	0.0396548	0.00555668	<0	<0	0.0281692	0.000983864	0.000345233	<0	<0	0.000437603	<0	0.0276902	0.0018573
PY06411	< 0	< 0	<0	<0	<0	<0	<0	0.06046	<0	<0	<0	<0	<0
PY06493	< 0	< 0	0.0145094	<0	<0	<0	<0	<0	<0	<0	<0	<0	<0
PY06495	0.00599706	< 0	<0	0.0102458	<0	<0	<0	<0	<0	<0	<0	<0	<0
PY06497	< 0	< 0	<0	<0	0.024967	<0	<0	<0	<0	<0	<0	<0	<0
PY06508	0.0211212	< 0	0.0120438	<0	0.0065213	0.00707471	0.00471343	0.014339	0.00566672	0.00652845	<0	<0	0.0716701
PY06547	< 0	0.00433562	<0	<0	<0	<0	<0	<0	0.0102133	<0	<0	<0	<0
PY06667	< 0	< 0	<0	<0	0.00346576	<0	<0	<0	<0	<0	<0	0.0937167	<0
PY06678	0.000984436	< 0	<0	<0	0.0496388	<0	<0	<0	<0	<0	<0	<0	0.0217561
PY06740	< 0	< 0	<0	<0	<0	<0	<0	<0	<0	<0	0.0449044	<0	<0
PY06742	< 0	< 0	0.00770293	<0	<0	<0	<0	<0	<0	<0	<0	<0	<0
PY06746	< 0	< 0	<0	<0	<0	<0	<0	<0	<0	<0	0.0310943	<0	<0
PY06754	0.0408807	< 0	0.0779068	0.291899	0.267075	0.275799	<0	0.265355	0.213742	0.0523102	0.190435	0.0108196	<0
PY06804	0.0168576	0.00738393	0.00778018	0.00371221	0.00172148	<0	0.0153135	0.0106663	0.0849576	<0	<0	0.0329343	0.00409334
PY06805	< 0	0.0729159	<0	<0	<0	<0	<0	<0	<0	<0	0.000102924	<0	<0
PY06819	0.0123892	< 0	<0	<0	0.00651772	<0	0.0186653	<0	0.0209661	<0	<0	0.00236156	<0
PY06827	< 0	< 0	0.0314216	<0	<0	<0	<0	<0	<0	<0	<0	0.0143853	0.0735011
PY06862	0.0078001	< 0	0.00779366	<0	<0	<0	<0	<0	<0	<0	<0	<0	<0
PY06863	< 0	< 0	<0	<0	<0	<0	<0	0.0996173	<0	<0	0.0165169	<0	<0
PY06886	< 0	< 0	<0	<0	<0	0.00242819	<0	<0	<0	<0	<0	<0	<0
PY06918	< 0	0.159228	0.266382	0.395085	0.0346325	0.0892955	0.0270546	0.0173641	0.0812459	0.0787124	0.137481	0.0115359	0.0801321
PY06920	0.23935	0.100543	0.108603	0.169797	0.0571562	0.107432	0.316104	0.150083	0.148771	0.157377	0.231277	0.0842095	0.213439	*
PY06988	< 0	< 0	0.00214801	<0	<0	<0	<0	<0	<0	<0	<0	<0	<0
PY06990	0.0151168	0.384054	0.00146914	0.029438	<0	<0	<0	0.0342166	<0	0.0479962	<0	<0	<0
PY06993	< 0	< 0	0.00448156	<0	<0	<0	<0	<0	0.0181744	<0	<0	<0	<0
PY07017	< 0	0.160992	<0	<0	<0	0.0430731	<0	<0	<0	<0	<0	<0	<0
PY07035	< 0	0.104709	<0	<0	<0	<0	<0	<0	<0	<0	<0	<0	<0
PY07052	0.102176	0.124087	<0	0.11285	0.081643	0.137091	0.140102	0.325332	0.112299	0.0875836	0.0197536	0.0586555	0.0890033	*
PY07053	< 0	< 0	<0	<0	<0	0.00980087	<0	<0	<0	<0	<0	<0	<0
PY07068	< 0	< 0	<0	<0	<0	<0	<0	<0	<0	<0	0.0235333	<0	<0
PY07080	< 0	< 0	<0	<0	<0	<0	<0	<0	<0	<0	0.0446439	<0	<0
PY07097	< 0	< 0	<0	0.00376437	<0	<0	<0	<0	<0	<0	<0	<0	<0
PY07111	< 0	< 0	0.01321	<0	<0	<0	<0	<0	<0	<0	<0	0.00811629	<0
PY07134	< 0	< 0	<0	0.00572855	<0	<0	<0	0.0338186	<0	<0	<0	<0	<0
PY07187	< 0	< 0	<0	<0	0.0242592	<0	<0	<0	<0	<0	<0	<0	0.00939511
PY07190	0.0440293	0.0345556	0.044446	0.0308839	0.0288931	0.0299828	0.160658	<0	0.0541523	0.0294365	0.0967694	<0	<0
PY07215	< 0	< 0	<0	<0	<0	<0	<0	0.0451829	<0	<0	<0	<0	<0
PY07226	< 0	< 0	<0	<0	<0	0.0280951	<0	<0	<0	<0	<0	<0	<0
PY07246	0.0329712	< 0	0.00225529	0.00573017	<0	<0	<0	<0	0.0240888	<0	<0	0.0300424	<0
PY07252	0.0149963	< 0	<0	<0	0.0495789	<0	<0	<0	<0	<0	<0	0.0052426	<0
PY07264	0.0489993	< 0	0.299752	0.273956	<0	0.294171	0.047609	0.0800684	0.0937552	0.0579871	0.229557	0.0289525	<0	*
PY07281	0.0232001	< 0	0.0295082	0.00836829	0.099401	0.00746719	<0	0.072489	<0	<0	0.0749641	<0	<0
PY07304	< 0	< 0	<0	<0	<0	<0	<0	<0	<0	<0	<0	<0	0.042449
PY07305	0.0520808	0.169677	<0	<0	<0	<0	<0	0.120755	<0	0.240834	<0	<0	0.075676
PY07342	0.105563	< 0	<0	0.0435342	<0	<0	<0	<0	0.0140567	0.0110087	0.0867372	0.0200103	<0
PY07354	< 0	< 0	<0	<0	<0	<0	<0	0.00281911	<0	<0	<0	<0	<0
PY07356	< 0	< 0	<0	<0	<0	<0	<0	<0	<0	0.0148602	<0	0.0117329	<0
PY07421	0.101371	0.0882236	0.138211	0.058007	0.0825612	0.0640624	0.109613	0.0193233	0.00411861	0.0831045	0.0731064	0.0845791	0.118595	*
PY07454	0.0398517	0.129202	<0	0.0387407	0.0265036	0.0275933	<0	0.00878047	0.278549	0.585853	<0	<0	<0
PY07473	< 0	< 0	<0	<0	0.00169482	<0	<0	<0	<0	<0	<0	<0	<0
PY07477	0.00677417	< 0	<0	<0	<0	<0	0.0403976	<0	0.00633199	<0	0.0426894	<0	0.0584284
PY07510	< 0	< 0	<0	0.0349788	<0	<0	<0	<0	<0	<0	<0	<0	<0
PY07512	< 0	< 0	<0	<0	<0	<0	<0	<0	<0	<0	0.0629955	<0	<0
PY07514	< 0	< 0	<0	6.09004e-05	<0	<0	<0	<0	0.0707757	<0	<0	<0	0.0806738
PY07516	< 0	< 0	<0	<0	<0	<0	0.0310843	<0	<0	<0	0.0432927	<0	<0
PY07518	< 0	< 0	<0	0.0152665	0.0258932	<0	<0	<0	<0	<0	<0	<0	<0
PY07524	< 0	0.0122074	<0	<0	<0	<0	<0	<0	<0	<0	0.0521755	<0	0.0701567
PY07533	< 0	0.0688522	<0	<0	<0	0.000109697	<0	<0	<0	<0	<0	0.0669775	<0
PY07575	< 0	< 0	0.352388	<0	<0	<0	<0	0.1899	<0	<0	<0	<0	<0
PY07600	< 0	< 0	0.00701755	<0	<0	0.0363723	0.0297954	0.0394403	<0	0.00150222	<0	0.062168	0.00292192
PY07626	< 0	0.0160953	<0	0.00838093	<0	<0	<0	0.00848616	0.0071238	0.0524117	<0	<0	<0
PY07645	< 0	0.0295101	0.0165476	<0	0.0949524	<0	<0	<0	<0	0.0575416	0.033463	<0	0.00336408
PY07653	< 0	< 0	<0	<0	<0	<0	<0	<0	0.0640559	<0	<0	<0	<0
PY07659	0.0209843	< 0	<0	<0	<0	<0	<0	<0	<0	<0	<0	<0	<0
PY03611 (a)	0.144944	0.355787	<0	0.0688559	0.147475	0.285027	<0	0.0532606	0.172734	0.856476	0.171187	0.178687	0.149438
PY03340 (a)	0.0451792	0.0357055	0.0577403	0.0320338	0.0300431	0.0311327	<0	0.0123199	0.0553022	0.0305864	0.0286016	0.0962448	0.0320061
PY03363 (a)	0.0155603	< 0	0.00130466	<0	<0	<0	<0	<0	<0	<0	<0	0.000513104	<0
PY05432 (b)	0.4041	0.897259	0.575852	0.67353	0.563213	0.461077	0.467978	1.09111	1.53061	1.28976	1.20432	0.485384	0.675744
PF10_0084	0.0718495	0.266577	<0	0.13389	0.123689	0.0578029	0.00255947	<0	0.107164	0.308476	0.0397176	0.0298867	0.0586764
PFE0960w	0.433648	0.0535054	0.273657	<0	0.0875153	<0	0.0945811	<0	0.11204	<0	0.0235333	0.0790558	0.0498061

## Sheet: High_medium in all clones
Genes showing high/medium transcription levels in all clones
	Starter Sz	Starter R/Tz	Clone 1 Sz	Clone 1 R/Tz	Clone 2 Sz	Clone 2 R/Tz	Clone 3 Sz	Clone 3 R/Tz	Clone 4 Sz	Clone 4 R/Tz	Clone 5 Sz	Clone 5 R/Tz	Clone 6 Sz
PY01110	Medium	Medium	High	Medium	Medium	Medium	High	Medium	Low	Medium	Medium	Medium	Medium	*
PY01966	High	High	Medium	High	High	Medium	Medium	Low	Medium	Medium	High	High	Medium	*
PY02114	Negative	High	High	Negative	Negative	High	High	High	Medium	High	High	High	High	*
PY02972	High	Medium	High	High	High	Low	High	Medium	Low	Medium	High	High	High	*
PY03178	Medium	Low	Medium	Medium	Medium	Medium	Medium	Medium	Medium	Medium	Medium	Medium	Medium	*
PY03986	High	High	Negative	High	High	High	Medium	High	High	High	High	High	High	*
PY04021	High	High	High	High	High	Medium	High	Medium	High	Medium	High	High	Medium	*
PY04310	Low	Medium	Medium	Low	Medium	Medium	Medium	Medium	Medium	Negative	Medium	Medium	Medium	*
PY05318	High	Medium	Negative	High	Medium	Medium	Medium	Medium	Medium	Medium	Medium	Medium	Medium	*
PY05894	High	High	High	High	Medium	Low	High	High	High	Low	High	High	High	*
PY06920	High	Medium	Medium	High	Medium	Medium	High	High	High	High	High	Medium	High	*
PY07052	Medium	High	Negative	Medium	Medium	High	High	High	Medium	Medium	Low	Medium	Medium	*
PY07421	Medium	Medium	High	Medium	Medium	Medium	Medium	Low	Low	Medium	Medium	Medium	Medium	*
